# Supplementary material for: The Role of ABO Blood Type in Patients with SARS-CoV-2 Infection: A Systematic Review
Source: MDPI journal article supplement (doi:10.3390/jcm11113029), 2022-05-27
Supplement: s1 [file s1]

## ABO blood type & SARS-CoV-2\_Search strategy

### MEDLINE (Pubmed) (2020 to May 2021)

"COVID-19"[Mesh]) OR "SARS-CoV-2 variants" [Supplementary Concept]) OR "SARS-CoV-2"[Mesh]) OR "2019 novel coronavirus disease" OR COVID19 OR "COVID-19 pandemic" OR "SARS-CoV-2 infection" OR "COVID-19 virus disease" OR "2019 novel coronavirus infection" OR "2019-nCoV infection" OR "coronavirus disease 2019" OR "coronavirus disease-19" OR "2019-nCoV disease" OR "COVID-19 virus infection" OR "2019-nCoV" OR "Wuhan coronavirus" OR "SARS-CoV-2" OR "2019 novel coronavirus" OR "COVID-19 virus" OR "coronavirus disease 2019 virus" OR "COVID19 virus" OR "Wuhan seafood market pneumonia virus" AND "ABO Blood-Group System"[Mesh]) OR "Rh-Hr Blood-Group System"[Mesh]) OR ("ABO Blood Group System\*"[Title/Abstract] OR "ABO Blood-Group System\*"[Title/Abstract] OR "ABO Factor\*"[Title/Abstract] OR "ABO blood group\*"[Title/Abstract] OR "blood type"[Title/Abstract] OR "blood group\*"[Title/Abstract] OR "ABO Group\*"[Title/Abstract] OR "Blood type A"[Title/Abstract] OR "Blood type B"[Title/Abstract] OR "Blood type AB"[Title/Abstract] OR "Blood type O"[Title/Abstract] OR "ABO blood type\*"[Title/Abstract] OR "ABO Blood-Group System\*"[Title/Abstract] OR "Rh-Hr Blood-Group System"[Title/Abstract] OR "Rh Hr Blood Group System\*"[Title/Abstract] OR "Rhesus Blood-Group System\*"[Title/Abstract] OR "Rhesus Blood Group System\*"[Title/Abstract])

### Embase (2020 to May 2021)

#1 'covid 19'/exp  
#2 '2019 novel coronavirus disease' OR covid19 OR 'covid-19 pandemic' OR 'sars-cov-2 infection' OR 'covid-19 virus disease' OR '2019 novel coronavirus infection' OR '2019-ncov infection' OR 'coronavirus disease 2019' OR 'coronavirus disease-19' OR '2019-ncov disease' OR 'covid-19 virus infection' OR '2019-ncov' OR 'wuhan coronavirus' OR 'sars-cov-2' OR '2019 novel coronavirus' OR 'covid-19 virus' OR 'coronavirus disease 2019 virus' OR 'covid19 virus' OR 'wuhan seafood market pneumonia virus' OR ncov OR covid:ti,ab  
#5 #1 OR #2 OR #3 OR #4  
#6 'blood group abo system'/exp/mj OR 'blood group rhesus system'/exp/mj  
#7 'abo blood group\* system\*' OR 'abo factor\*' OR 'abo blood group\*' OR 'blood type' OR 'blood group\*' OR 'abo group\*' OR 'blood type a' OR 'blood type b' OR 'blood type ab' OR 'abo blood type\*' OR 'abo blood-group system\*' OR 'rh-hr blood-group system' OR 'rh hr blood group system\*' OR 'rhesus blood-group system\*' OR 'rhesus blood group system\*' OR 'rh factor\*' OR 'rh factor':ti,ab  
#8 #6 OR #7  
#9 #5 AND #8  
#10 #5 AND #8 AND [embase]/limAND [2020-2021]/py

### Cochrane Central Register of Controlled Trials (CENTRAL; 2021, Issue 5) in the Cochrane Library (searched May 2021)

#1 MeSH descriptor: [Coronavirus Infections] explode all trees  
#2 MeSH descriptor: [COVID-19] explode all trees  
#3 MeSH descriptor: [] explode all trees  
#4 MeSH descriptor: [SARS-CoV-2] explode all trees  
#5 ('Coronavirus Infection'):ti,ab,kw  
#6 ('2019 novel coronavirus disease'):ti,ab,kw  
#7 'COVID-19 pandemic'  
#8 (COVID19):ti,ab,kw  
#9 ('COVID-19 pandemic'):ti,ab,kw  
#10 ('SARS-CoV-2 infection' OR 'COVID-19 virus disease'):ti,ab,kw  
#11 '2019 novel coronavirus infection'  
#12 ('coronavirus disease 2019'):ti,ab,kw  
#13 ('coronavirus disease-19' OR 'COVID-19 virus infection'):ti,ab,kw

Table S1: ABO blood type & SARS-CoV-2\_Search strategy

**NEWCASTLE - OTTAWA QUALITY ASSESSMENT SCALE  
CASE CONTROL STUDIES**

Note: A study can be awarded a maximum of one star for each numbered item within the Selection and Exposure categories. A maximum of two stars can be given for Comparability.

**Selection**

- 1) Is the case definition adequate?
  - a) yes, with independent validation
  - b) yes, eg record linkage or based on self reports
  - c) no description
- 2) Representativeness of the cases
  - a) consecutive or obviously representative series of cases
  - b) potential for selection biases or not stated
- 3) Selection of Controls
  - a) community controls
  - b) hospital controls
  - c) no description
- 4) Definition of Controls
  - a) no history of disease (endpoint)
  - b) no description of source

**Comparability**

- 1) Comparability of cases and controls on the basis of the design or analysis
  - a) study controls for \_\_\_\_\_ (Select the most important factor.)
  - b) study controls for any additional factor  (This criteria could be modified to indicate specific control for a second important factor.)

**Exposure**

- 1) Ascertainment of exposure
  - a) secure record (eg surgical records)
  - b) structured interview where blind to case/control status
  - c) interview not blinded to case/control status
  - d) written self report or medical record only
  - e) no description
- 2) Same method of ascertainment for cases and controls
  - a) yes
  - b) no
- 3) Non-Response rate
  - a) same rate for both groups
  - b) non respondents described
  - c) rate different and no designation

**NEWCASTLE - OTTAWA QUALITY ASSESSMENT SCALE  
COHORT STUDIES**

Note: A study can be awarded a maximum of one star for each numbered item within the Selection and Outcome categories. A maximum of two stars can be given for Comparability

**Selection**

- 1) Representativeness of the exposed cohort
  - a) truly representative of the average \_\_\_\_\_ (describe) in the community
  - b) somewhat representative of the average \_\_\_\_\_ in the community
  - c) selected group of users eg nurses, volunteers
  - d) no description of the derivation of the cohort
- 2) Selection of the non exposed cohort
  - a) drawn from the same community as the exposed cohort
  - b) drawn from a different source
  - c) no description of the derivation of the non exposed cohort
- 3) Ascertainment of exposure
  - a) secure record (eg surgical records)
  - b) structured interview
  - c) written self report
  - d) no description
- 4) Demonstration that outcome of interest was not present at start of study
  - a) yes
  - b) no

**Comparability**

- 1) Comparability of cohorts on the basis of the design or analysis
  - a) study controls for \_\_\_\_\_ (select the most important factor)
  - b) study controls for any additional factor  (This criteria could be modified to indicate specific control for a second important factor.)

**Outcome**

- 1) Assessment of outcome
  - a) independent blind assessment
  - b) record linkage
  - c) self report
  - d) no description
- 2) Was follow-up long enough for outcomes to occur
  - a) yes (select an adequate follow up period for outcome of interest)
  - b) no
- 3) Adequacy of follow up of cohorts
  - a) complete follow up - all subjects accounted for
  - b) subjects lost to follow up unlikely to introduce bias - small number lost - > \_\_\_\_ % (select an adequate %) follow up, or description provided of those lost)
  - c) follow up rate < \_\_\_\_% (select an adequate %) and no description of those lost
  - d) no statement

Figure S1: Newcastle Ottawa Scale;

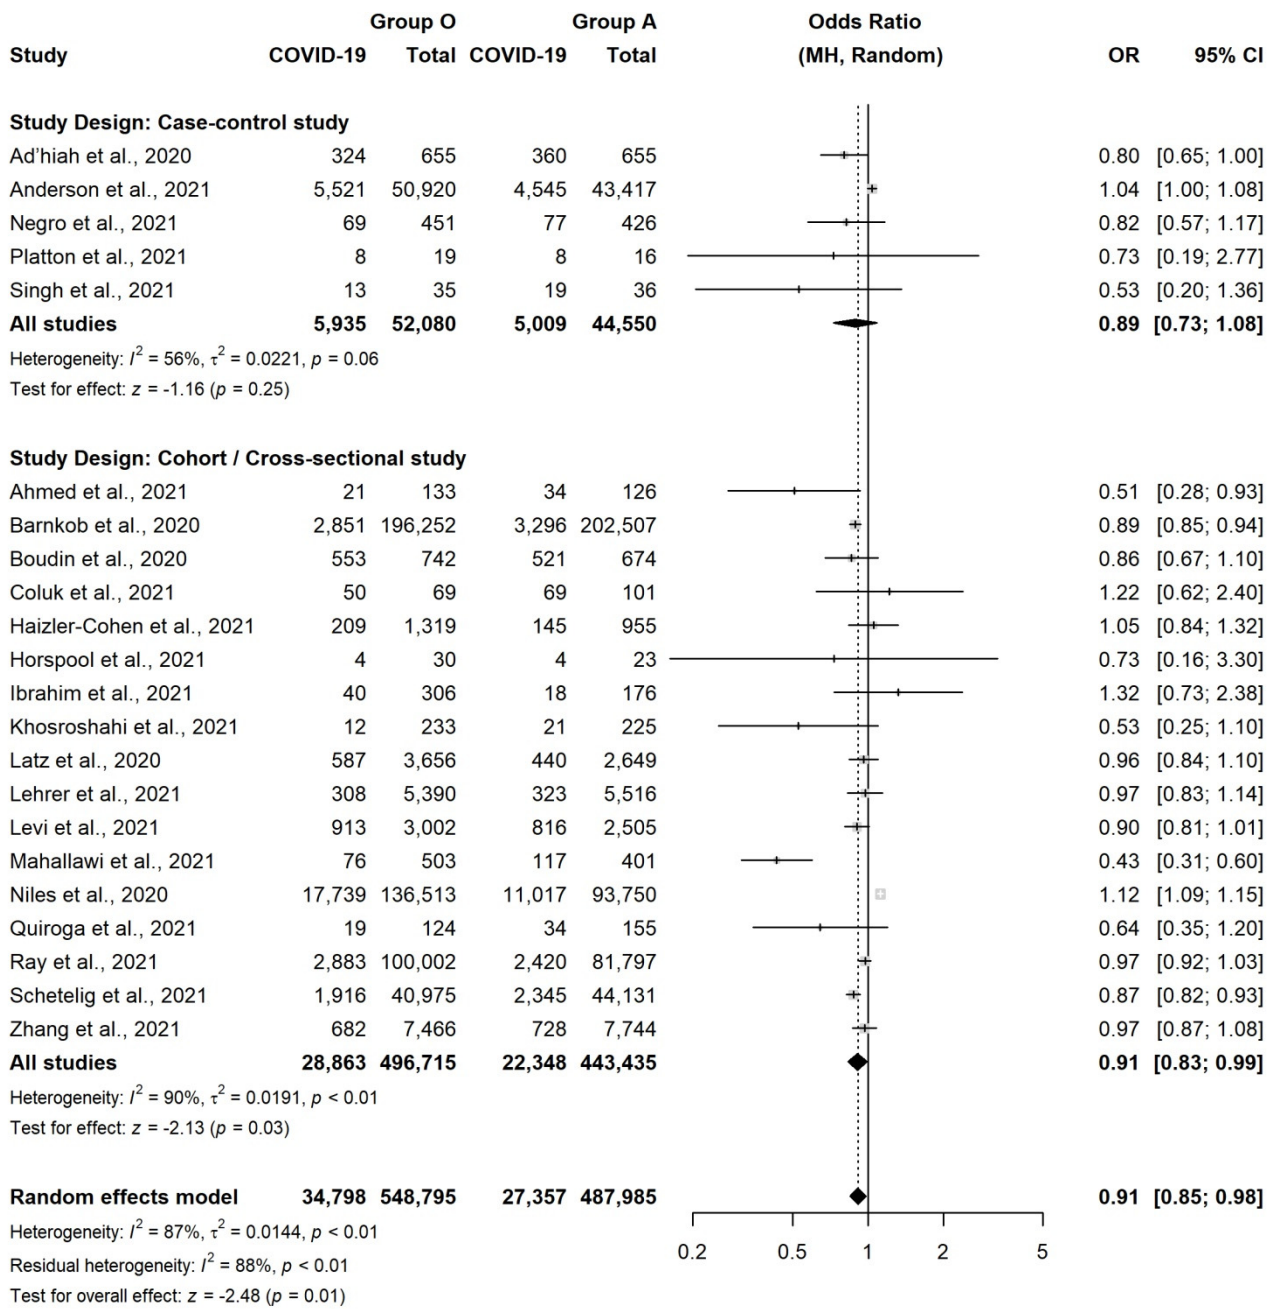

Figure S2: Forest plot for the occurrence of SARS-CoV-2 infection in patients with Blood Group O versus Group A

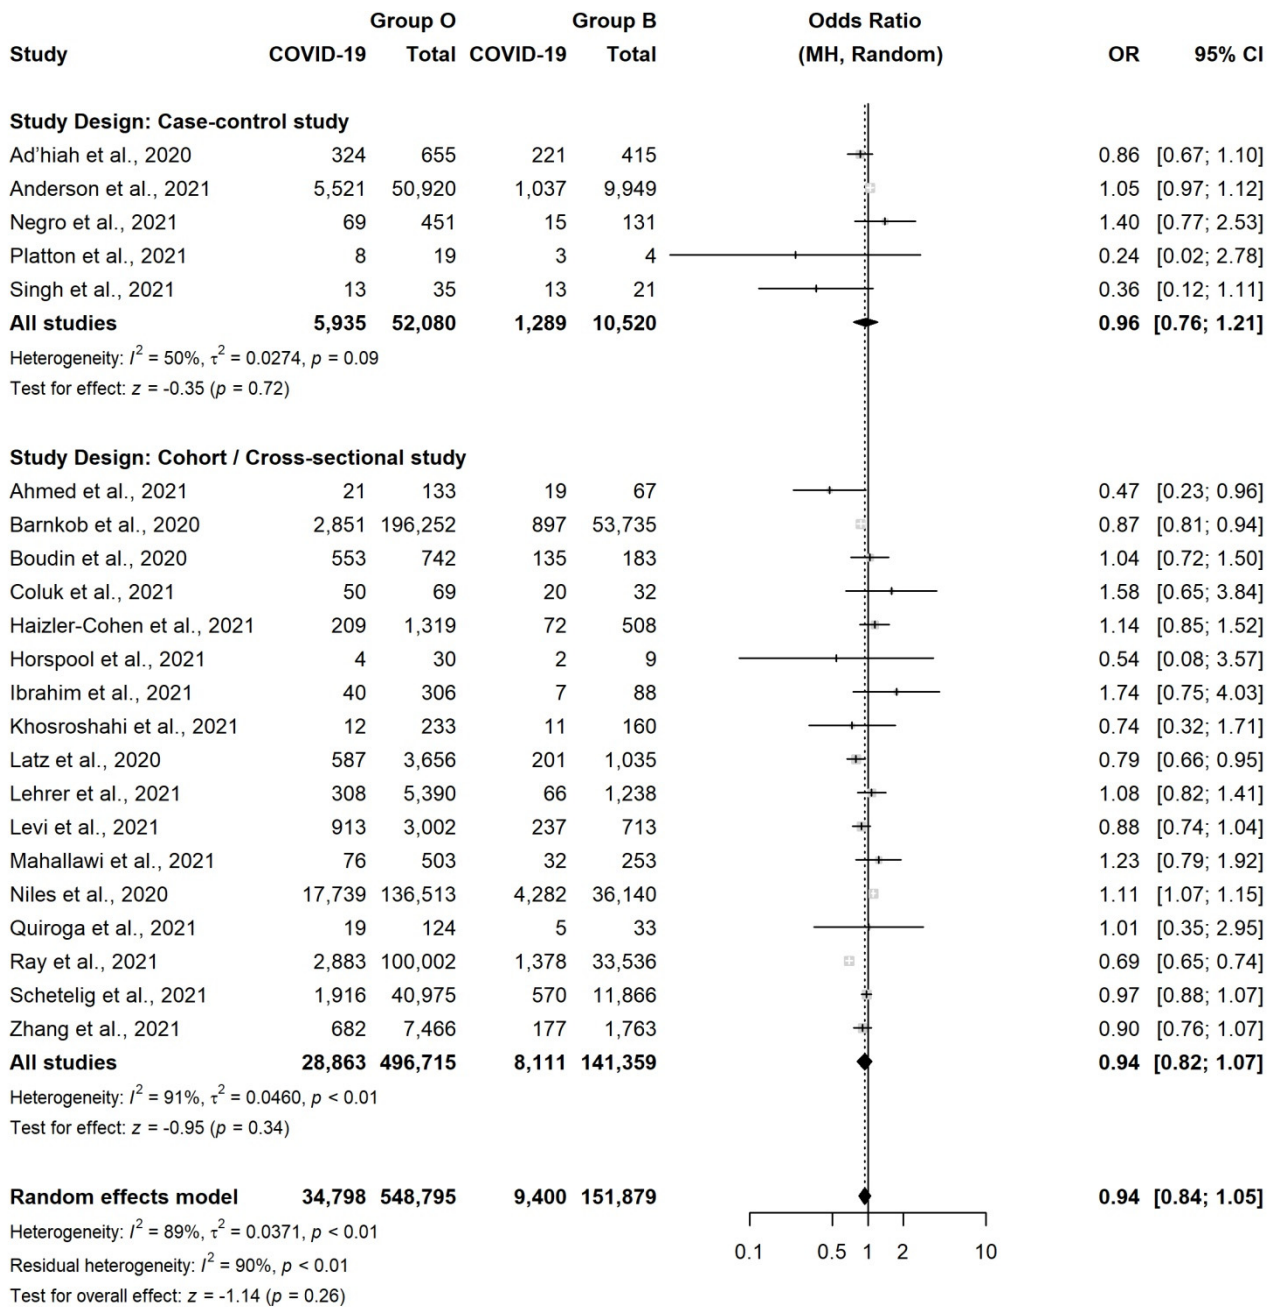

Figure S3: Forest plot for the occurrence of SARS-CoV-2 infection in patients with Blood Group O versus Group B

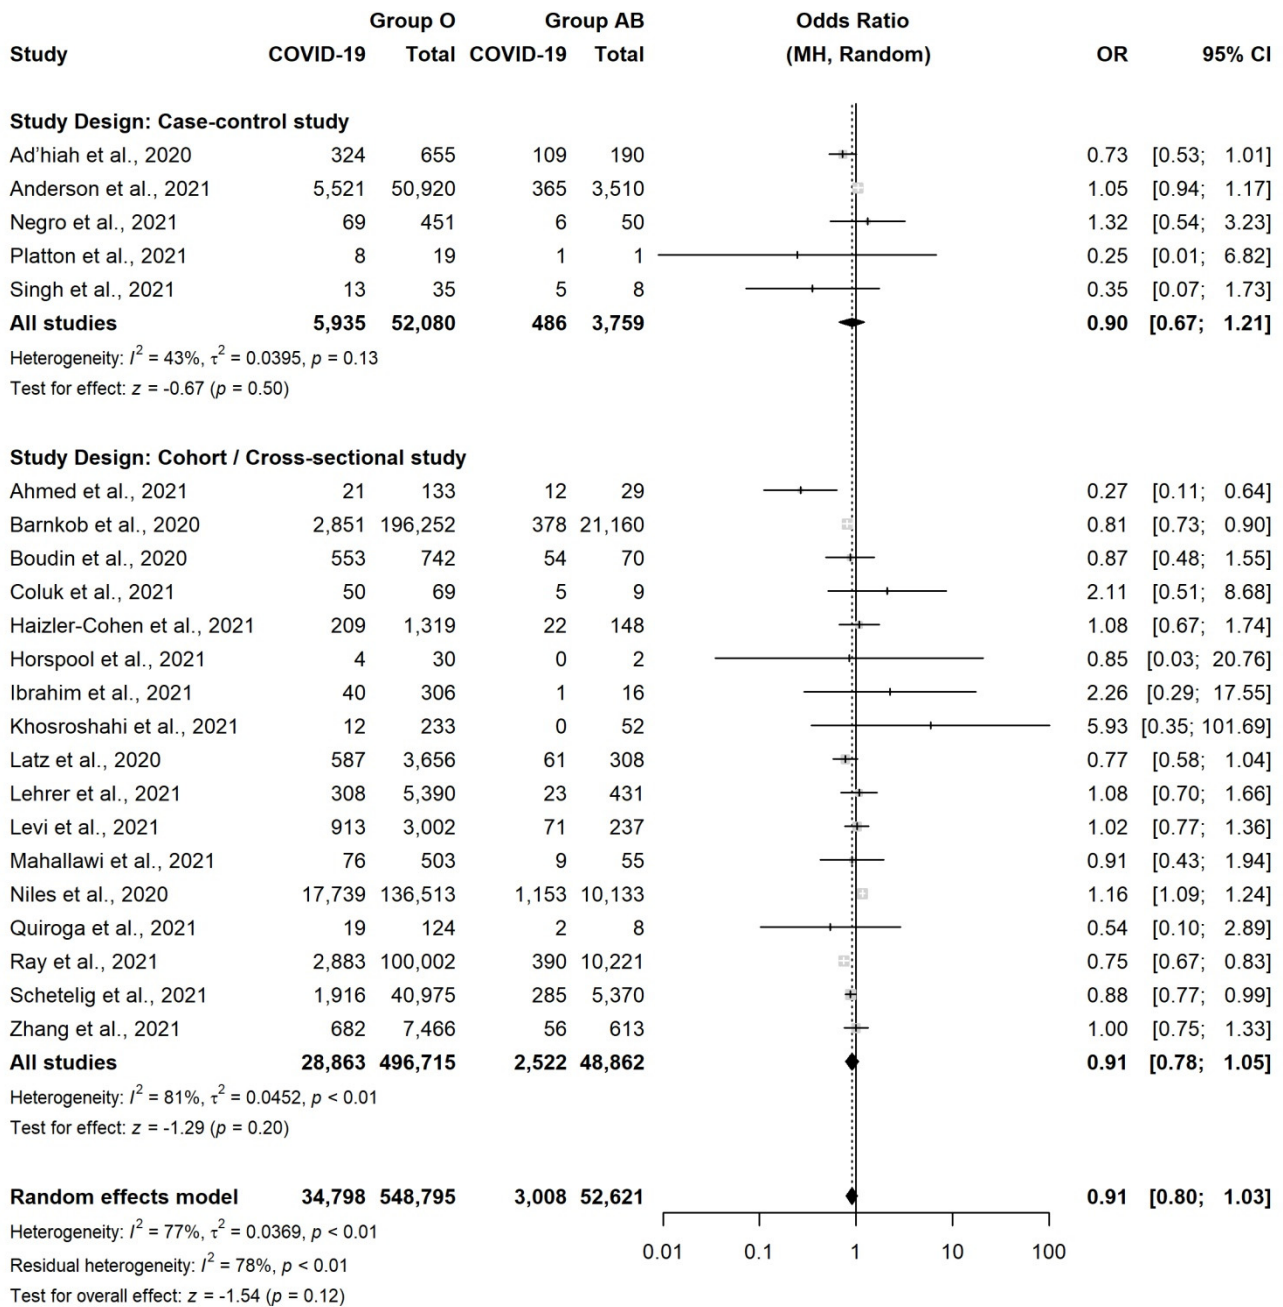

Figure S4: Forest plot for the occurrence of SARS-CoV-2 infection in patients with Blood Group O versus Group AB

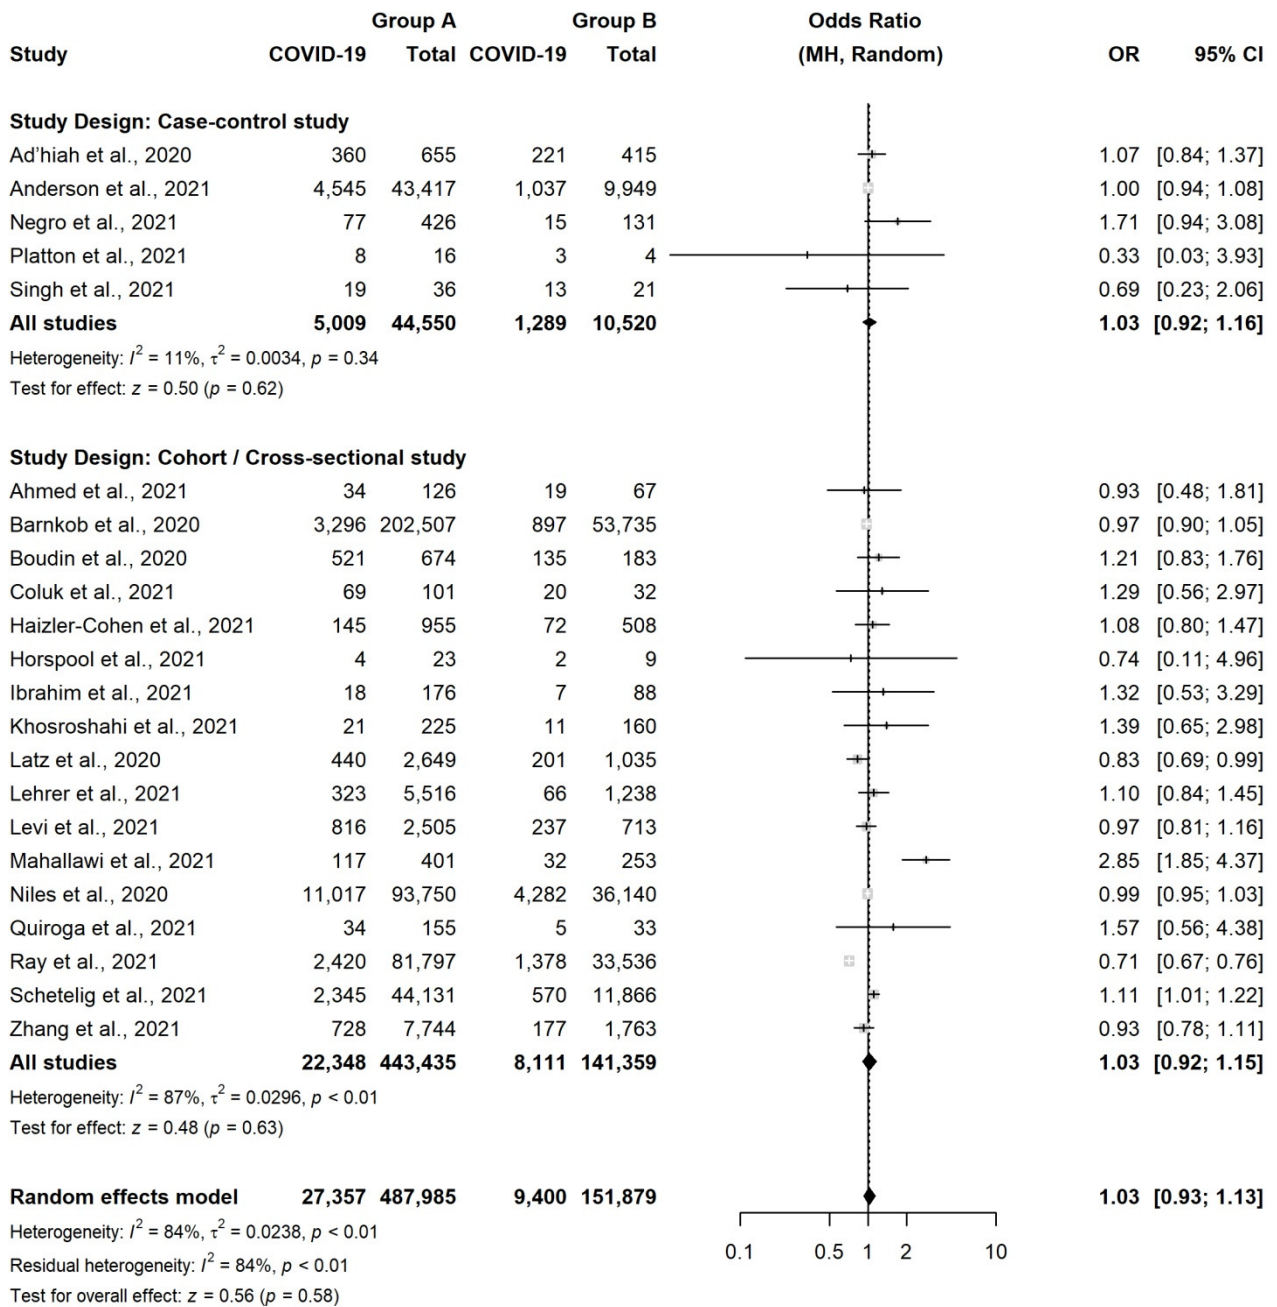

Figure S5: Forest plot for the occurrence of SARS-CoV-2 infection in patients with Blood Group A versus Group B

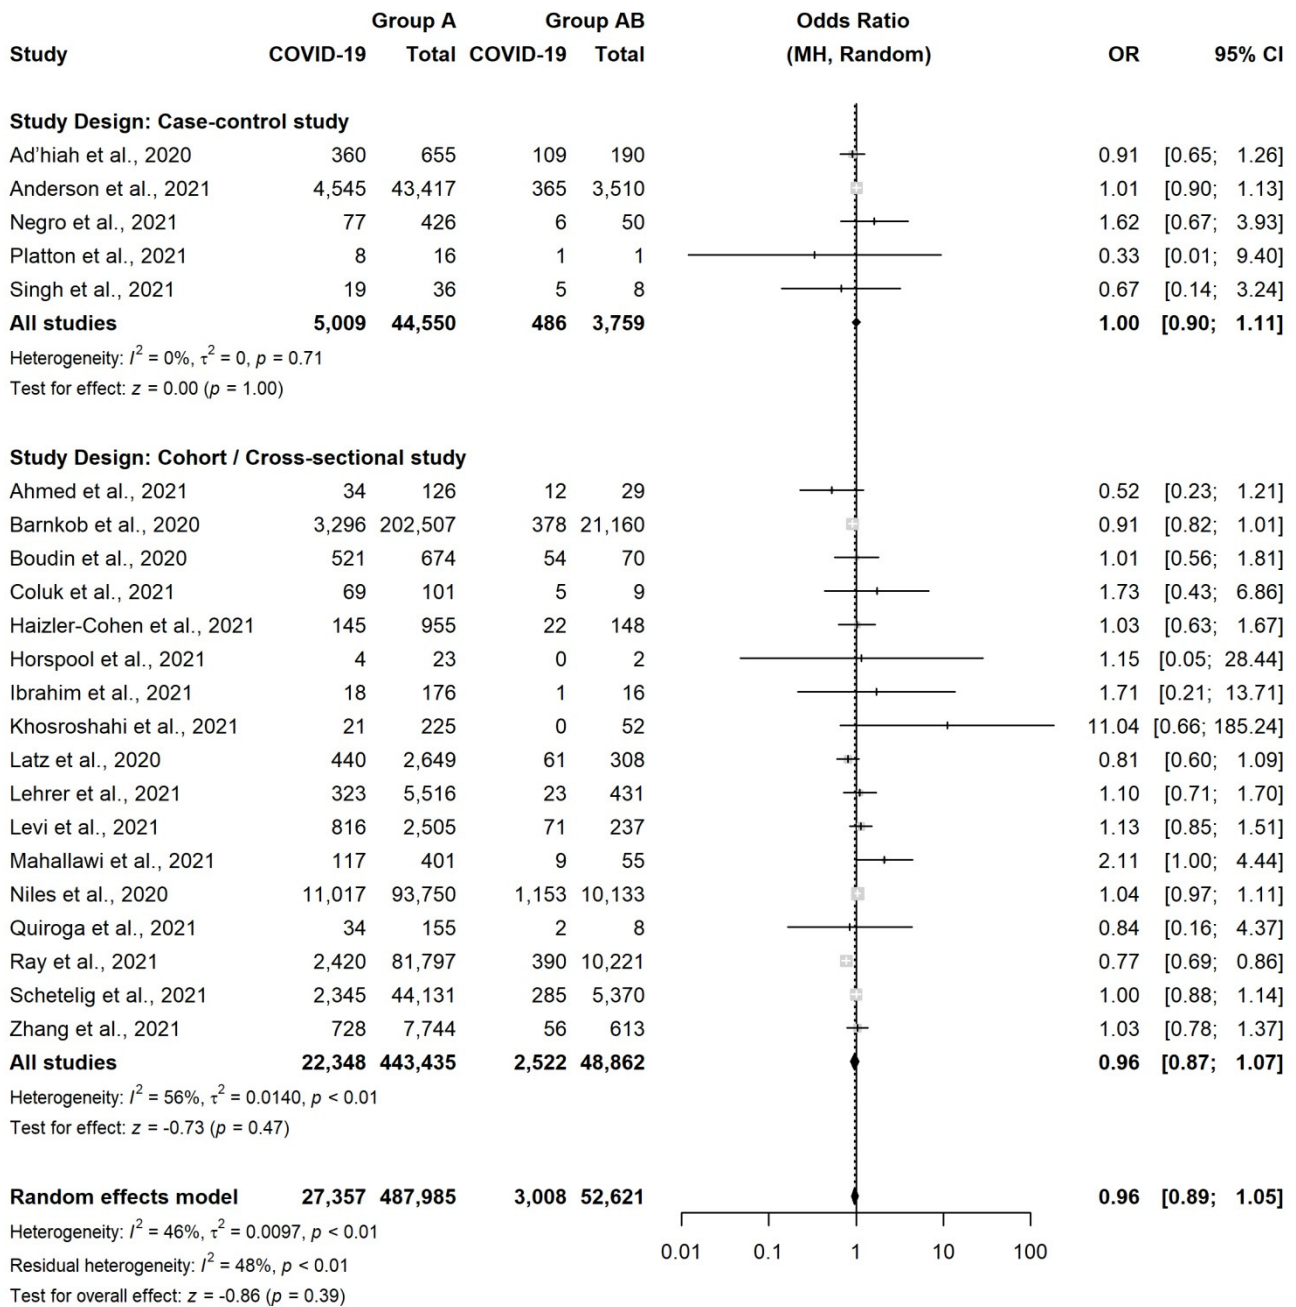

Figure S6: Forest plot for the occurrence of SARS-CoV-2 infection in patients with Blood Group A versus Group AB



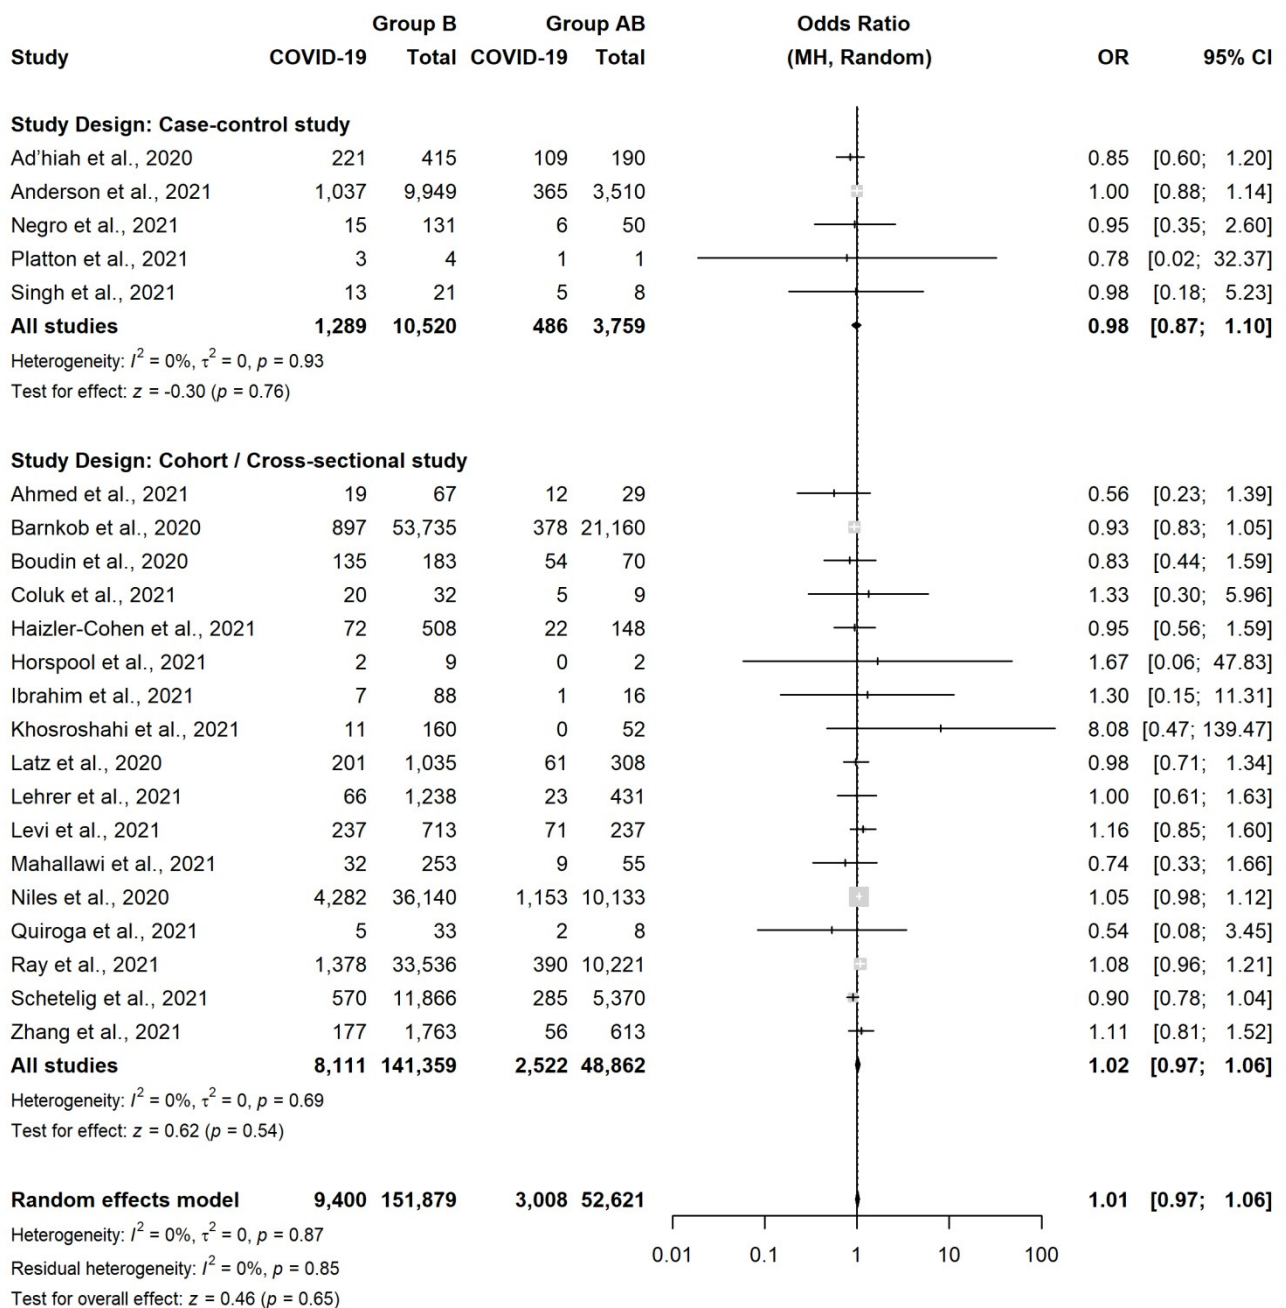

Figure S7: Forest plot for the occurrence of SARS-CoV-2 infection in patients with Blood Group B versus Group AB.
